# Supplementary material
Source: PubMed Central journal article supplement (PMC4330517)

### Histogram of CNV counts (prior to merge) before QC

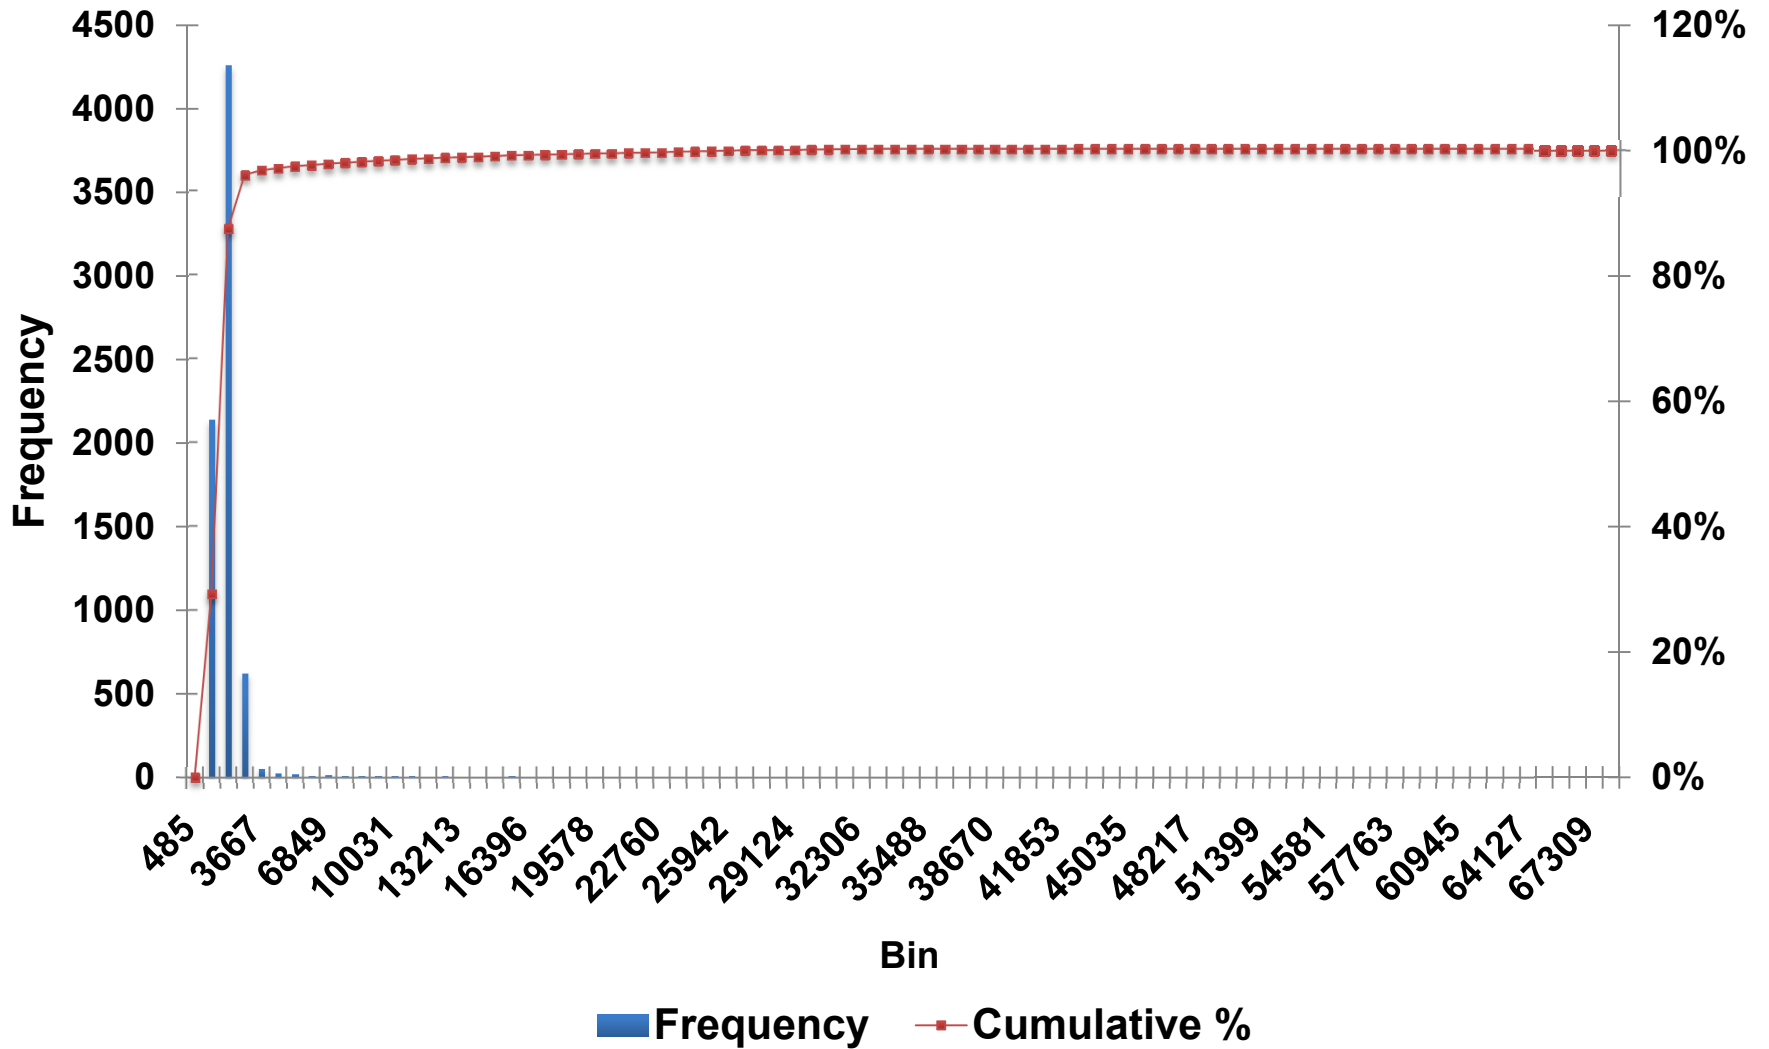

Supplement: npp2014290x1.pdf [file npp2014290x1.pdf]

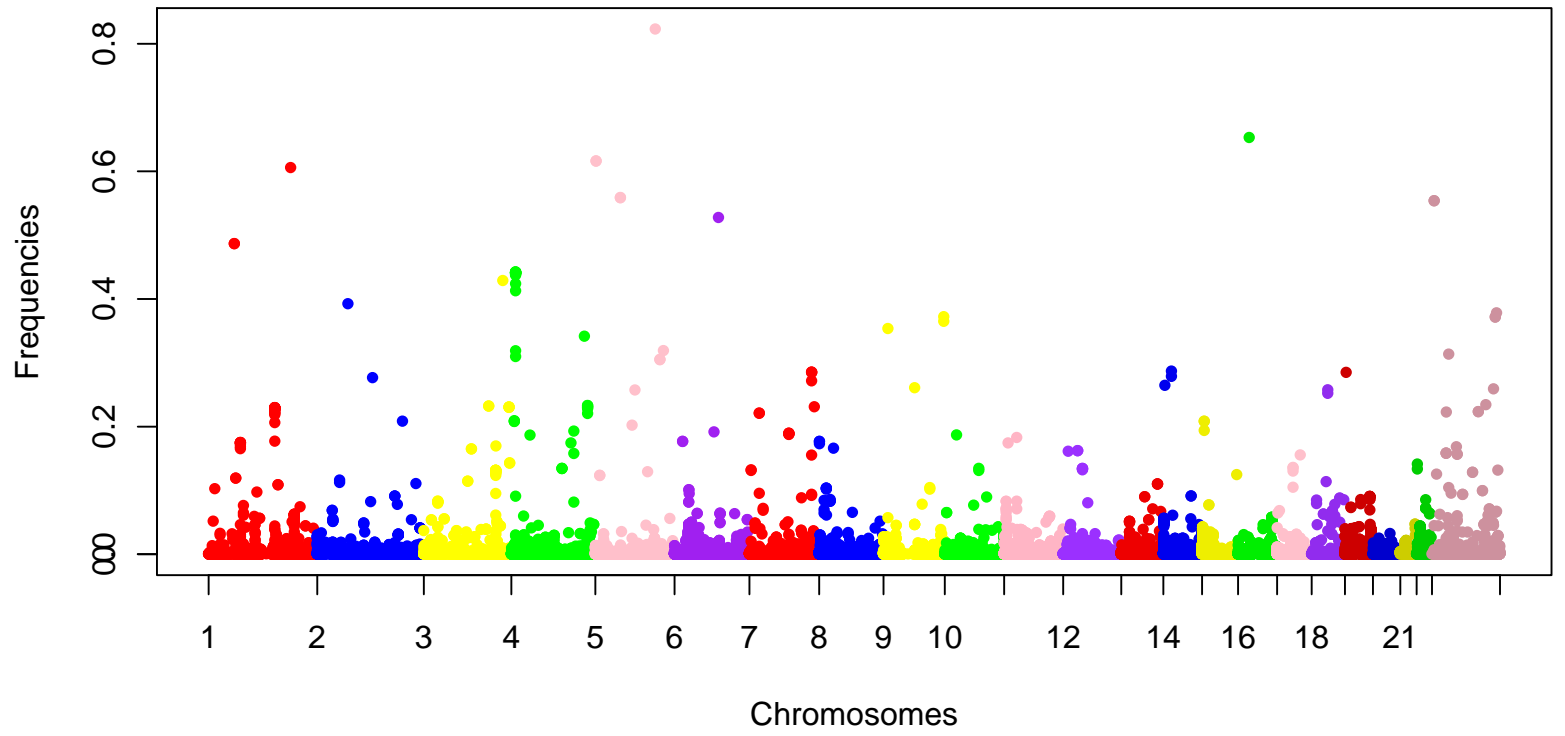

Supplement: npp2014290x10.pdf [file npp2014290x10.pdf]

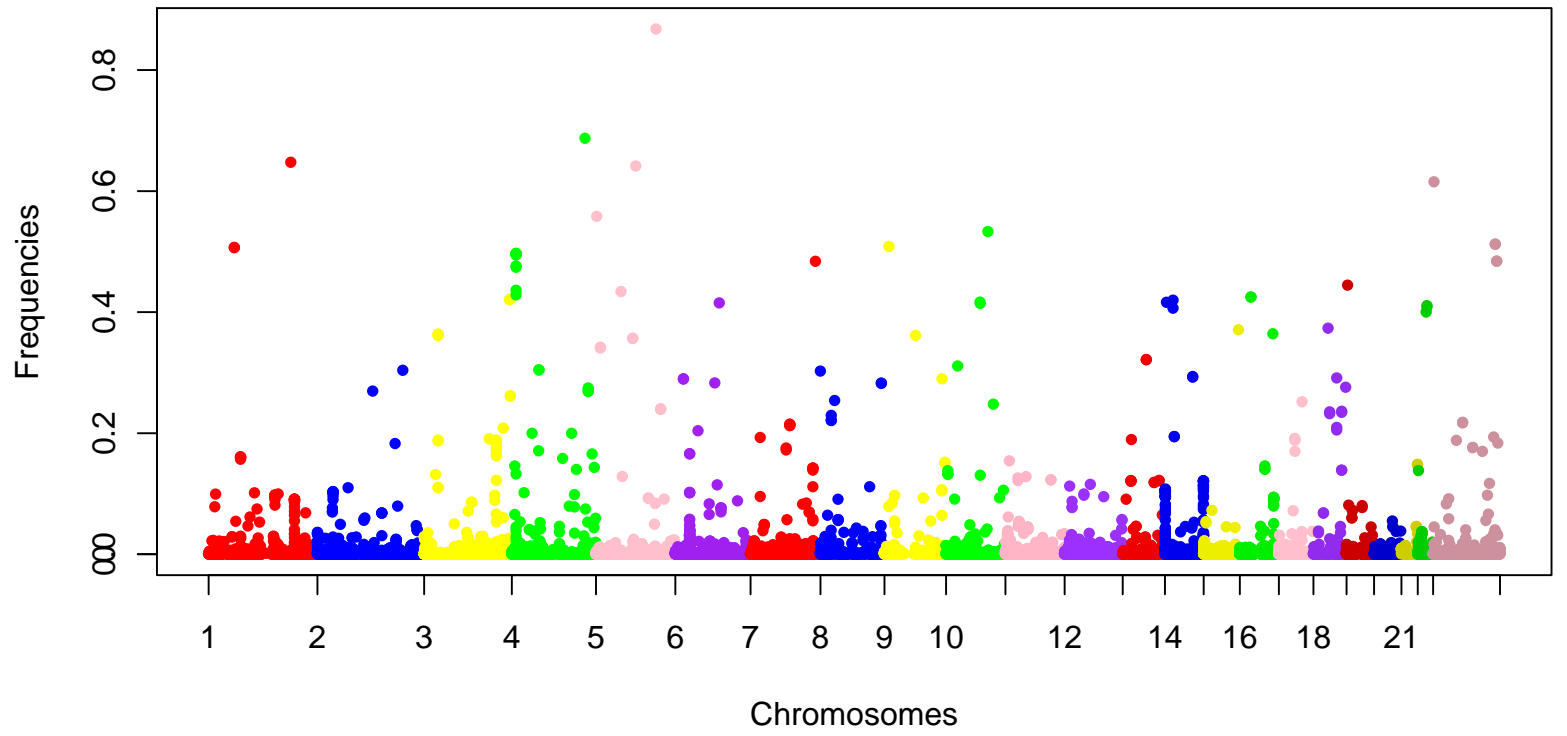

Supplement: npp2014290x11.pdf [file npp2014290x11.pdf]

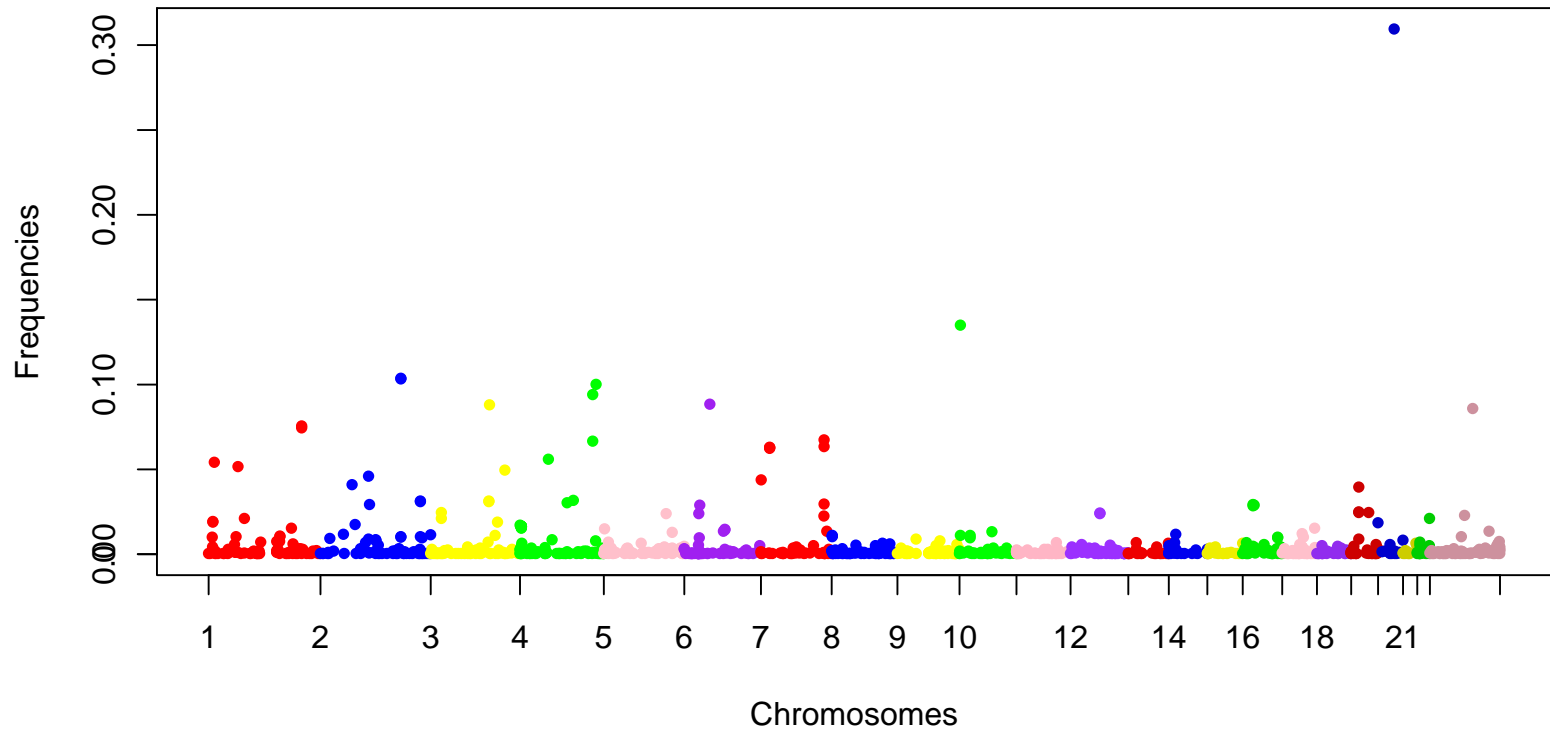

Supplement: npp2014290x12.pdf [file npp2014290x12.pdf]

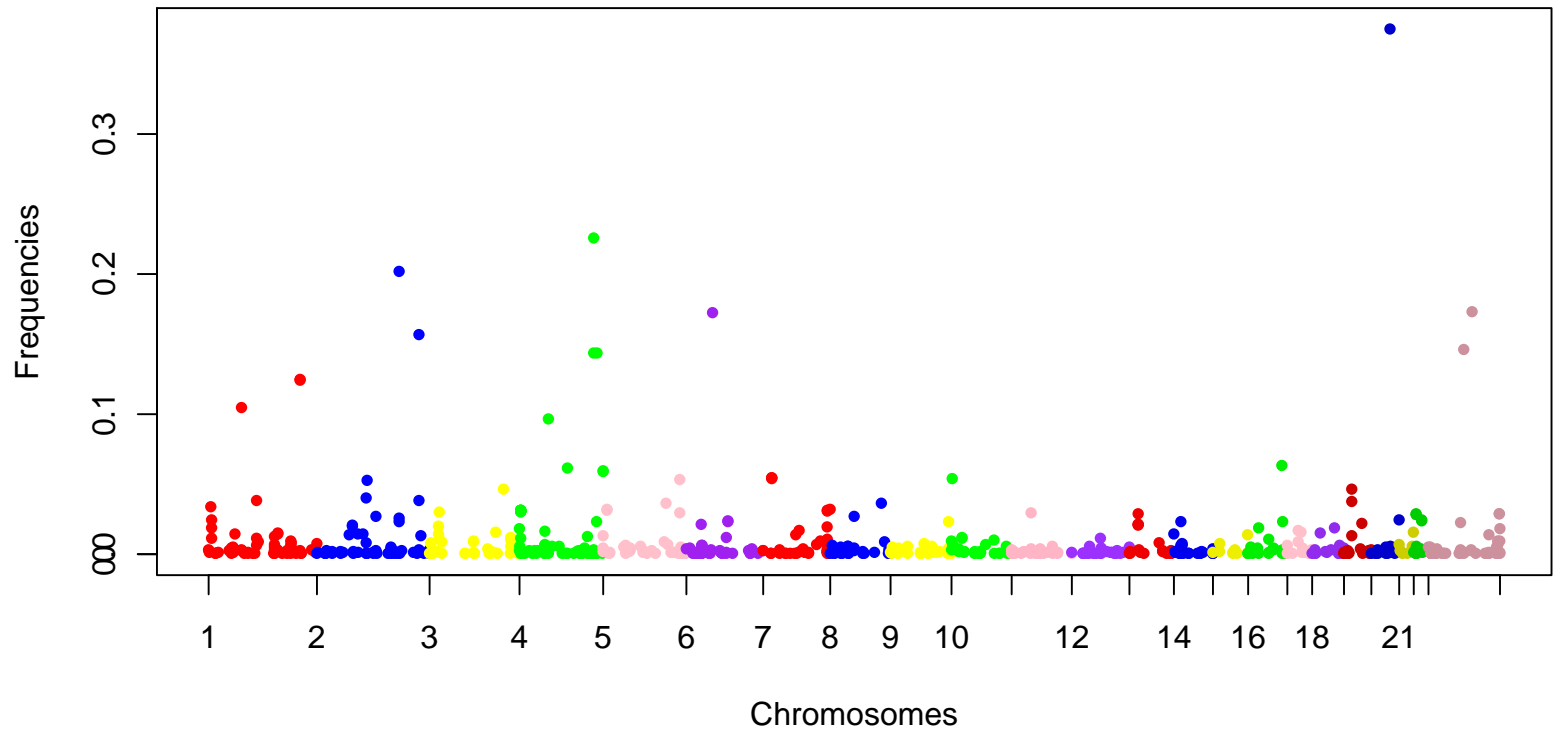

Supplement: npp2014290x13.pdf [file npp2014290x13.pdf]

### Histogram of CNV counts (prior to merge) after QC

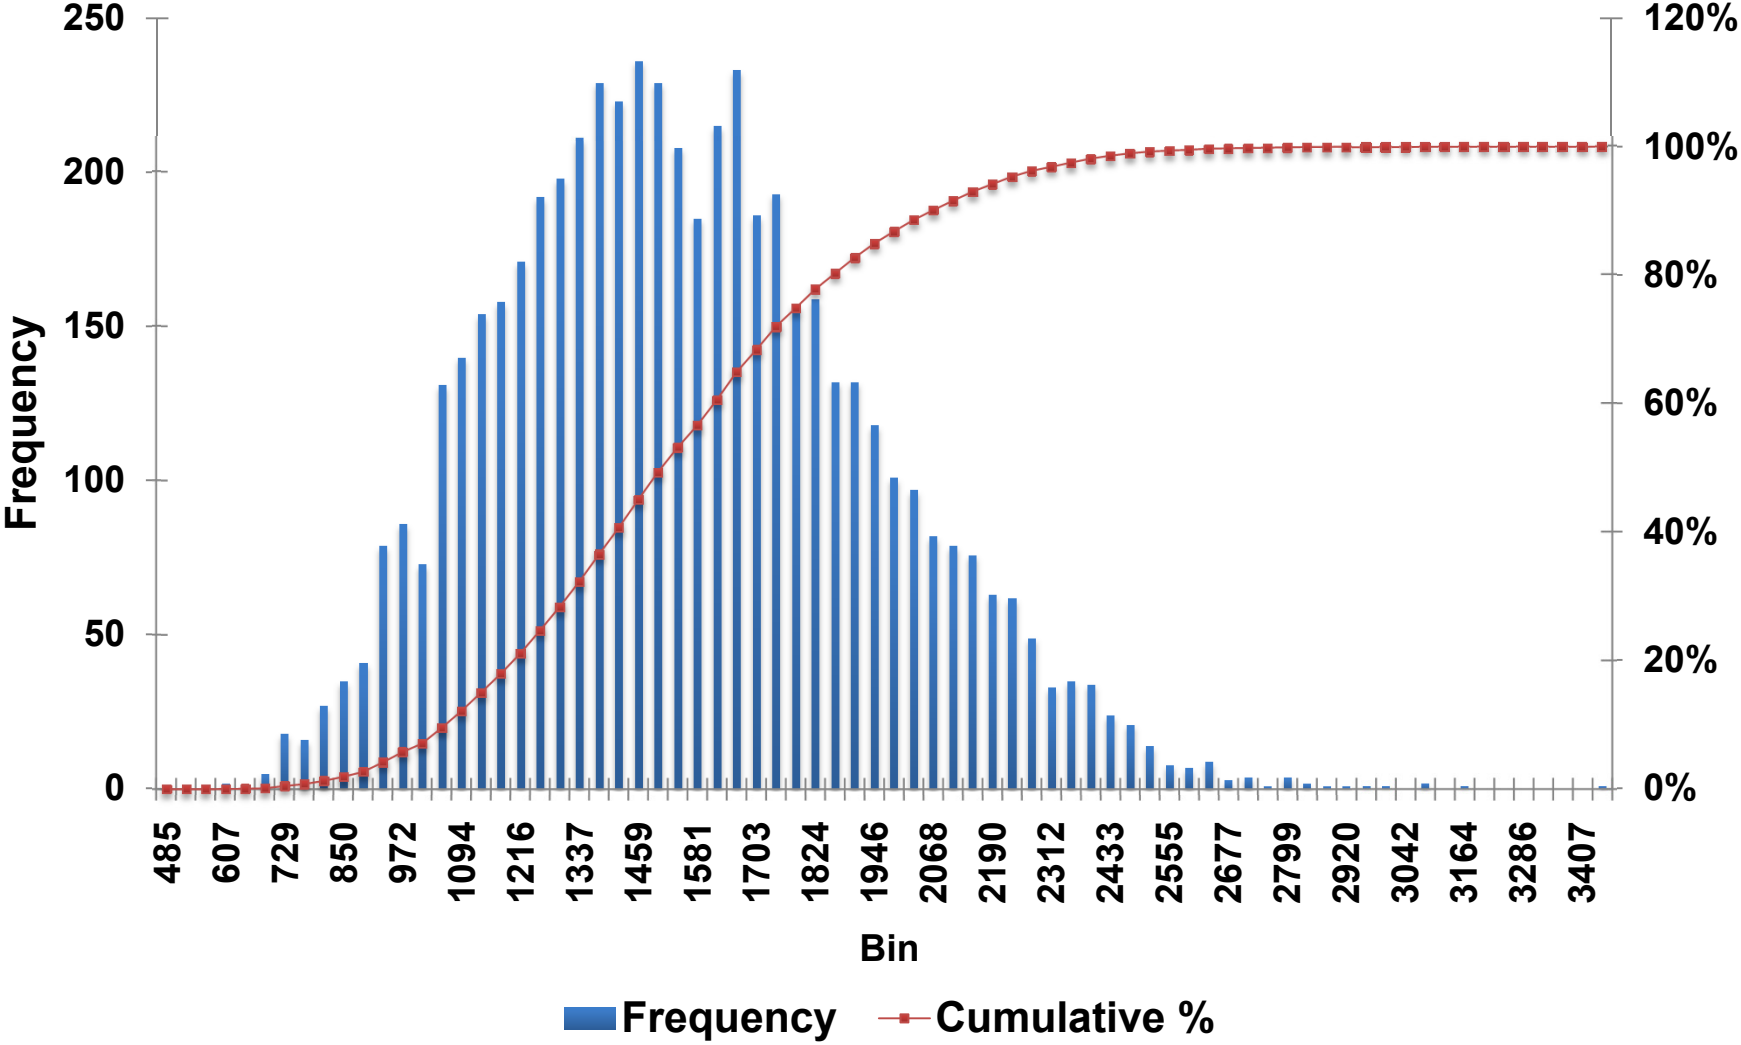

Supplement: npp2014290x2.pdf [file npp2014290x2.pdf]

# Histogram of 0-copy CNV counts before QC

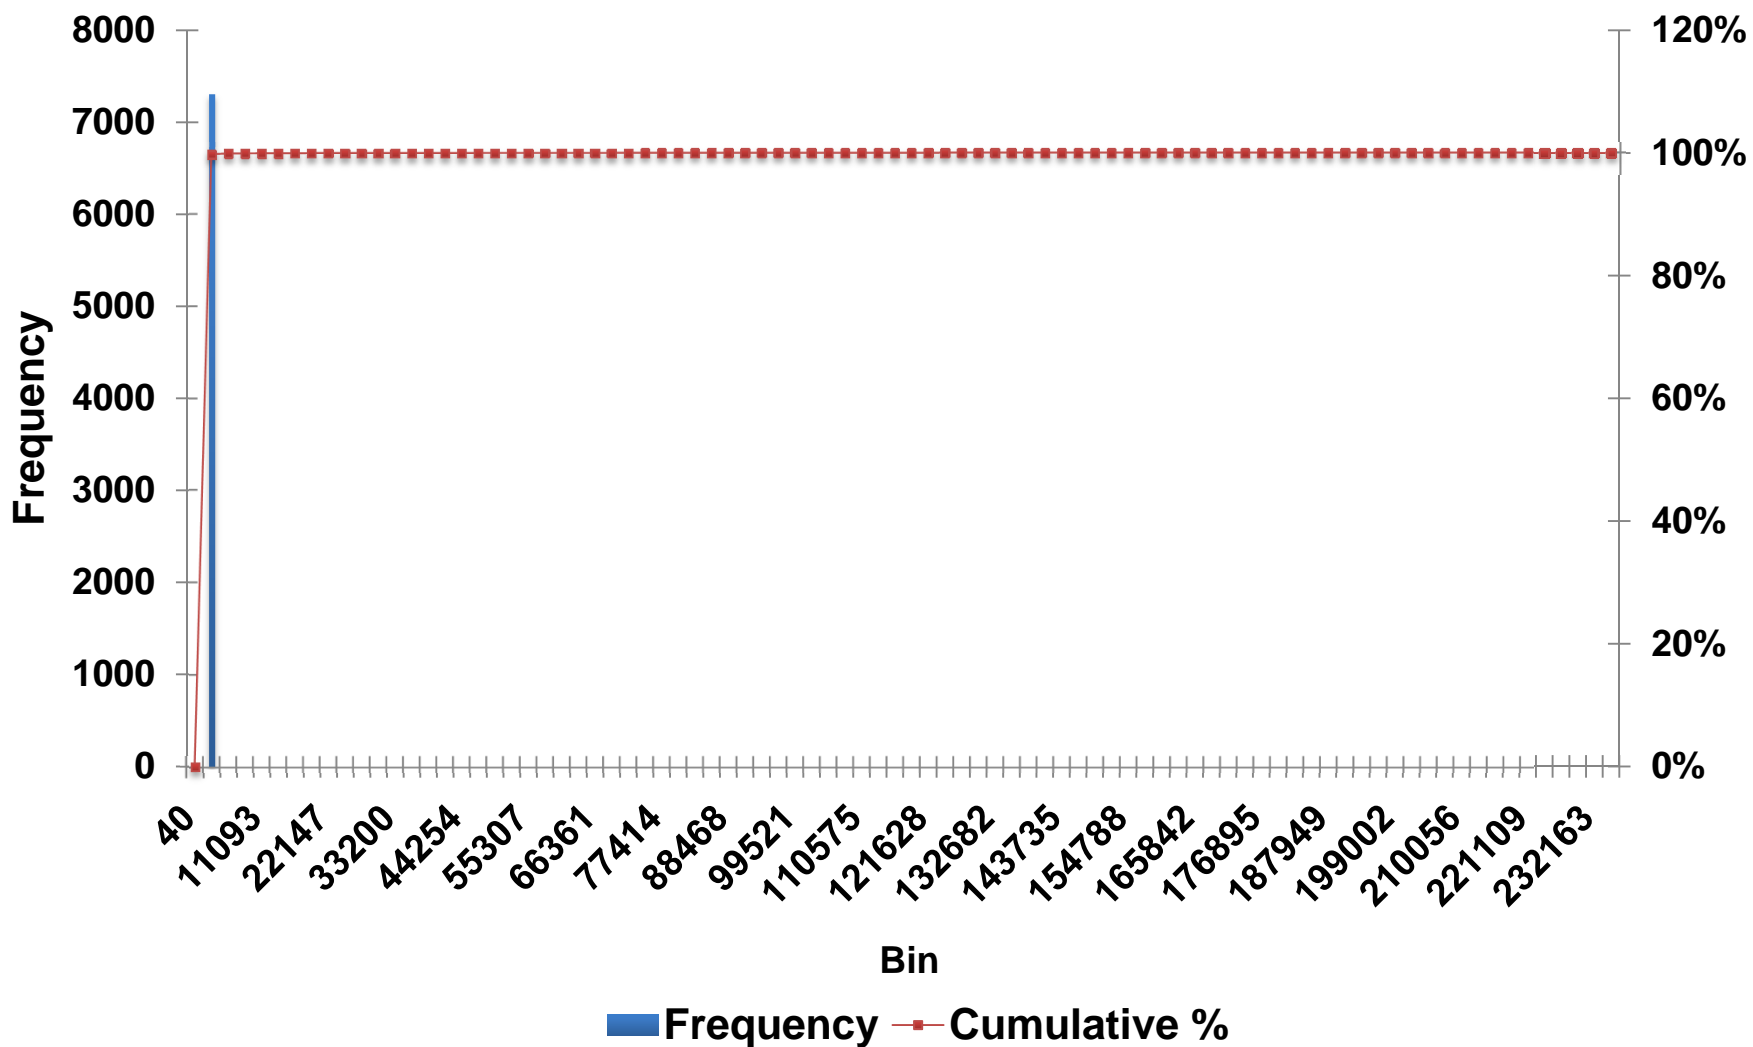

Supplement: npp2014290x3.pdf [file npp2014290x3.pdf]

# Histogram of 0-copy CNV counts after QC

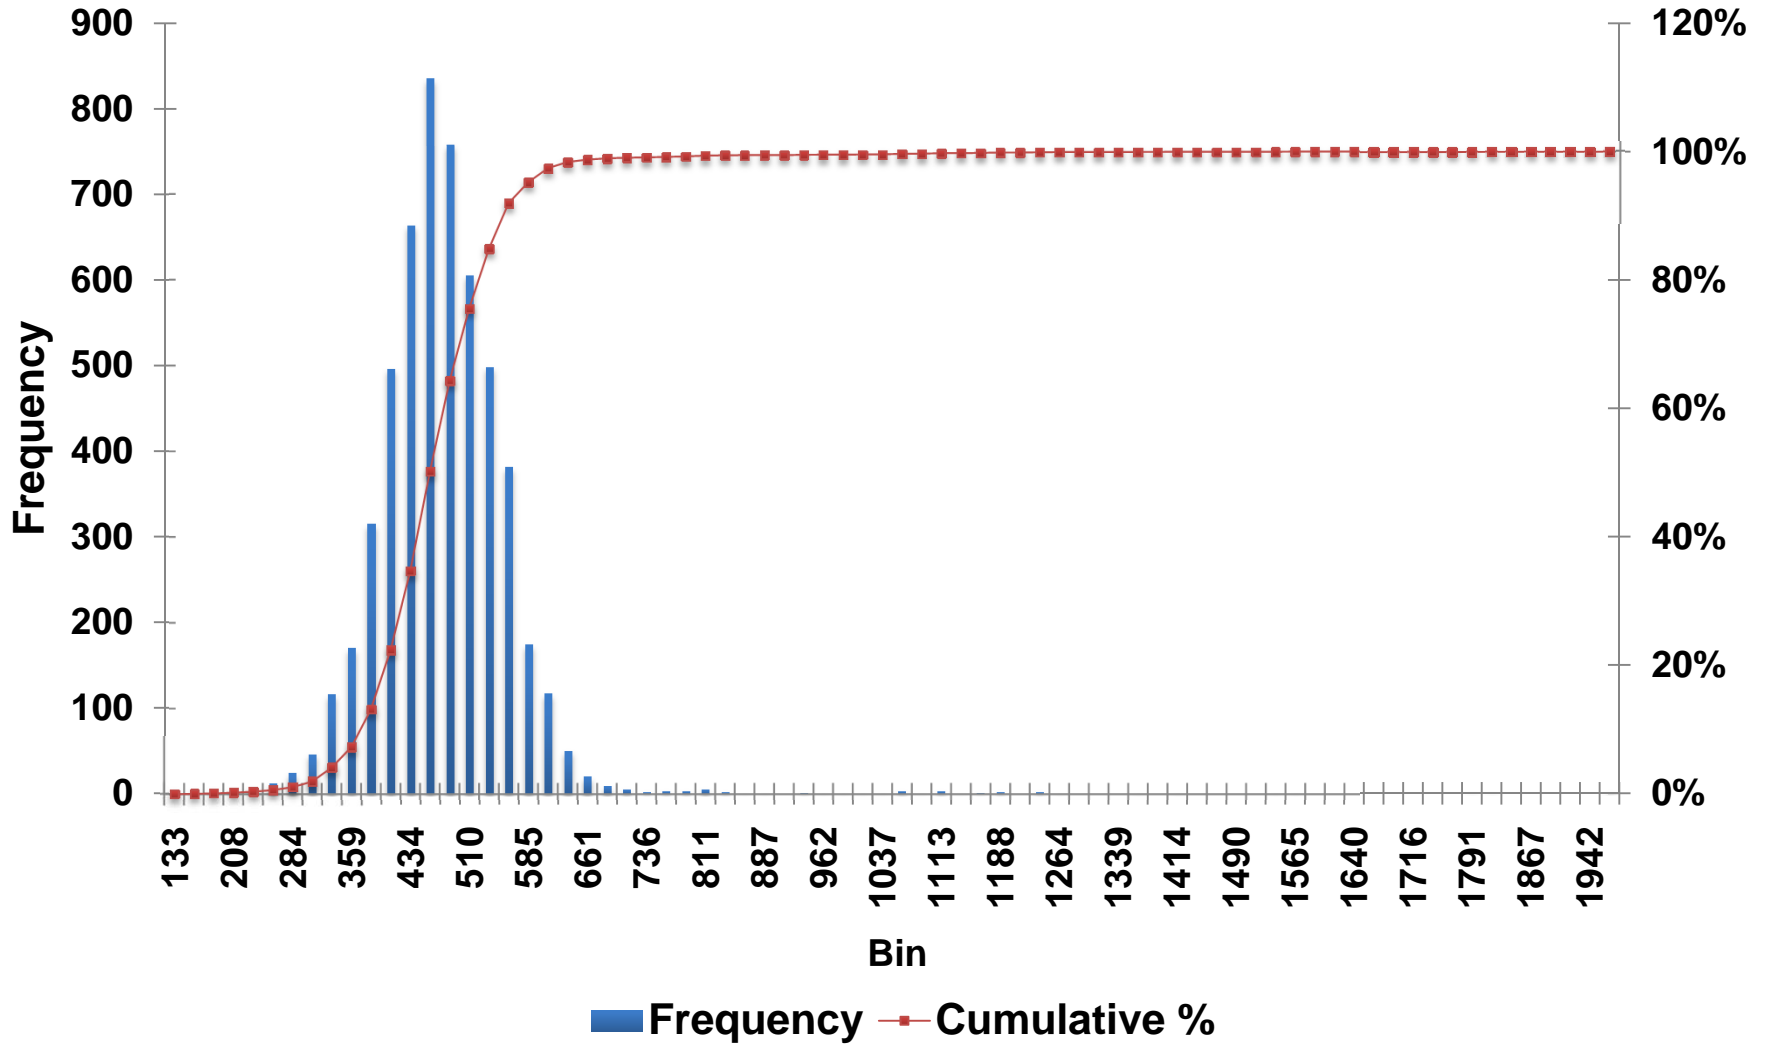

Supplement: npp2014290x4.pdf [file npp2014290x4.pdf]

### Histogram of CNV counts based on PennCNV (autosomes)

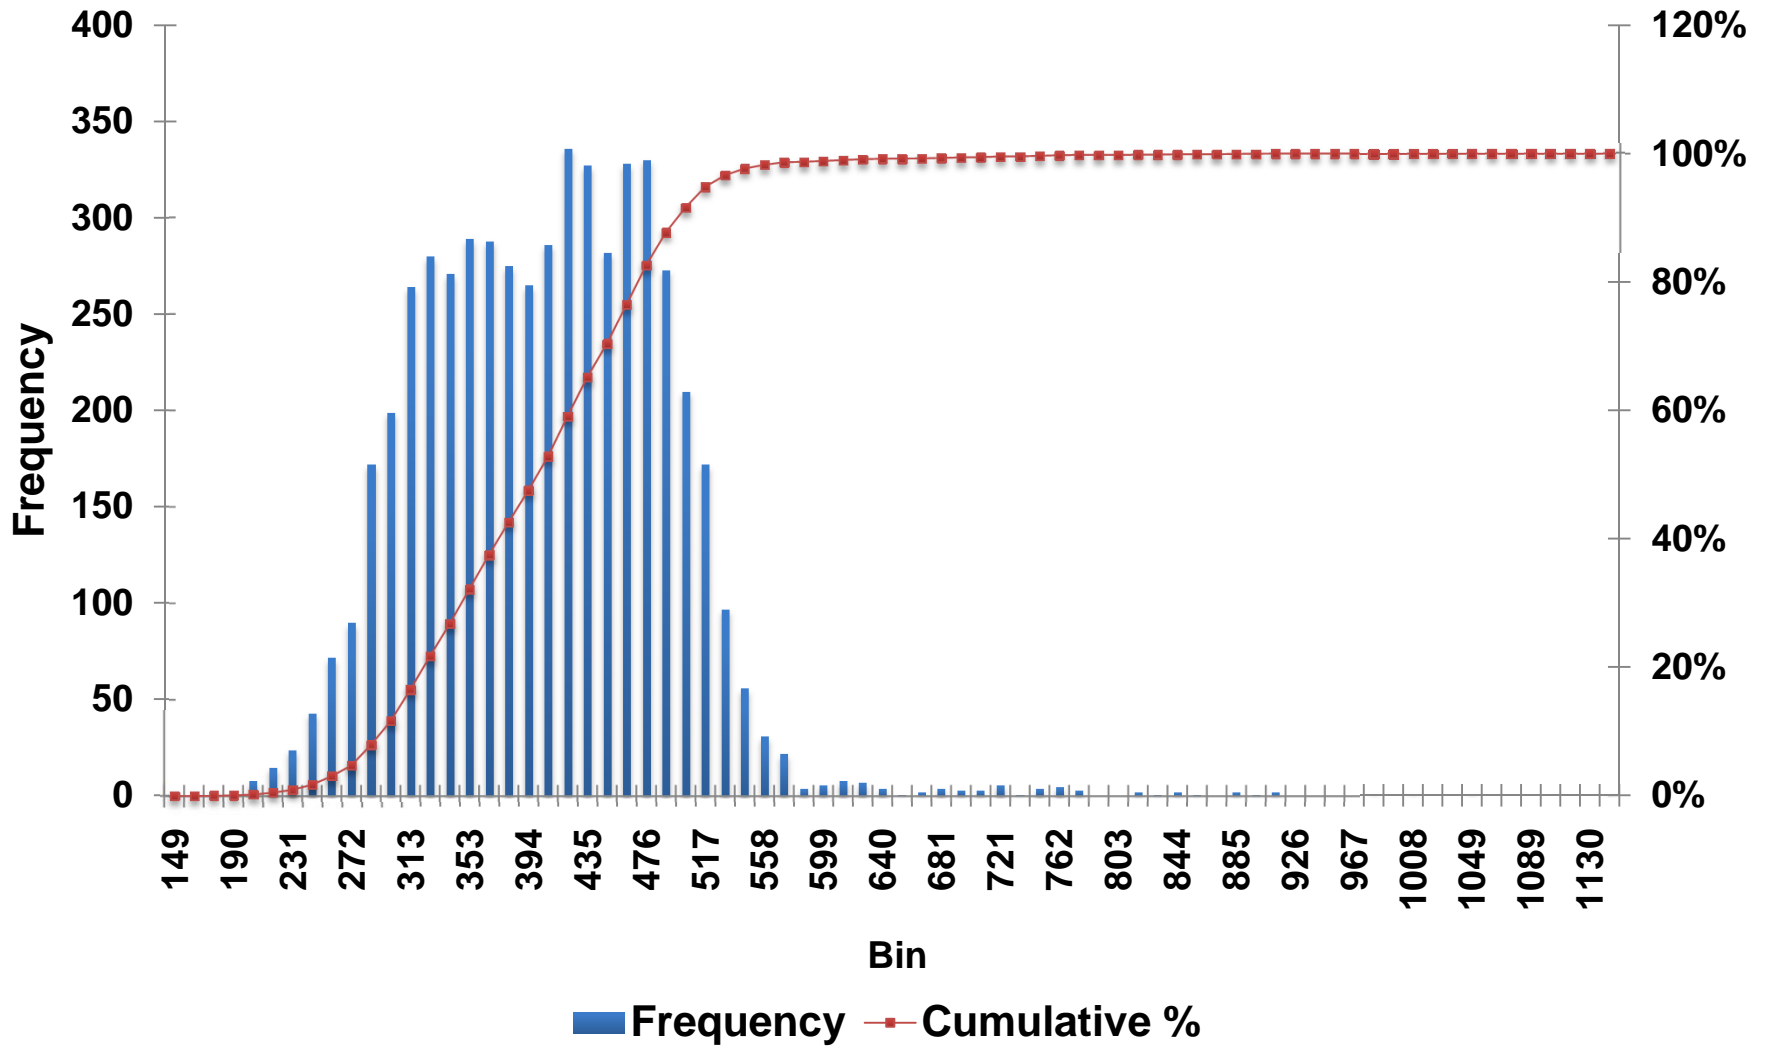

Supplement: npp2014290x5.pdf [file npp2014290x5.pdf]

### Histogram of CNV counts based on QuantiSNP (autosomes)

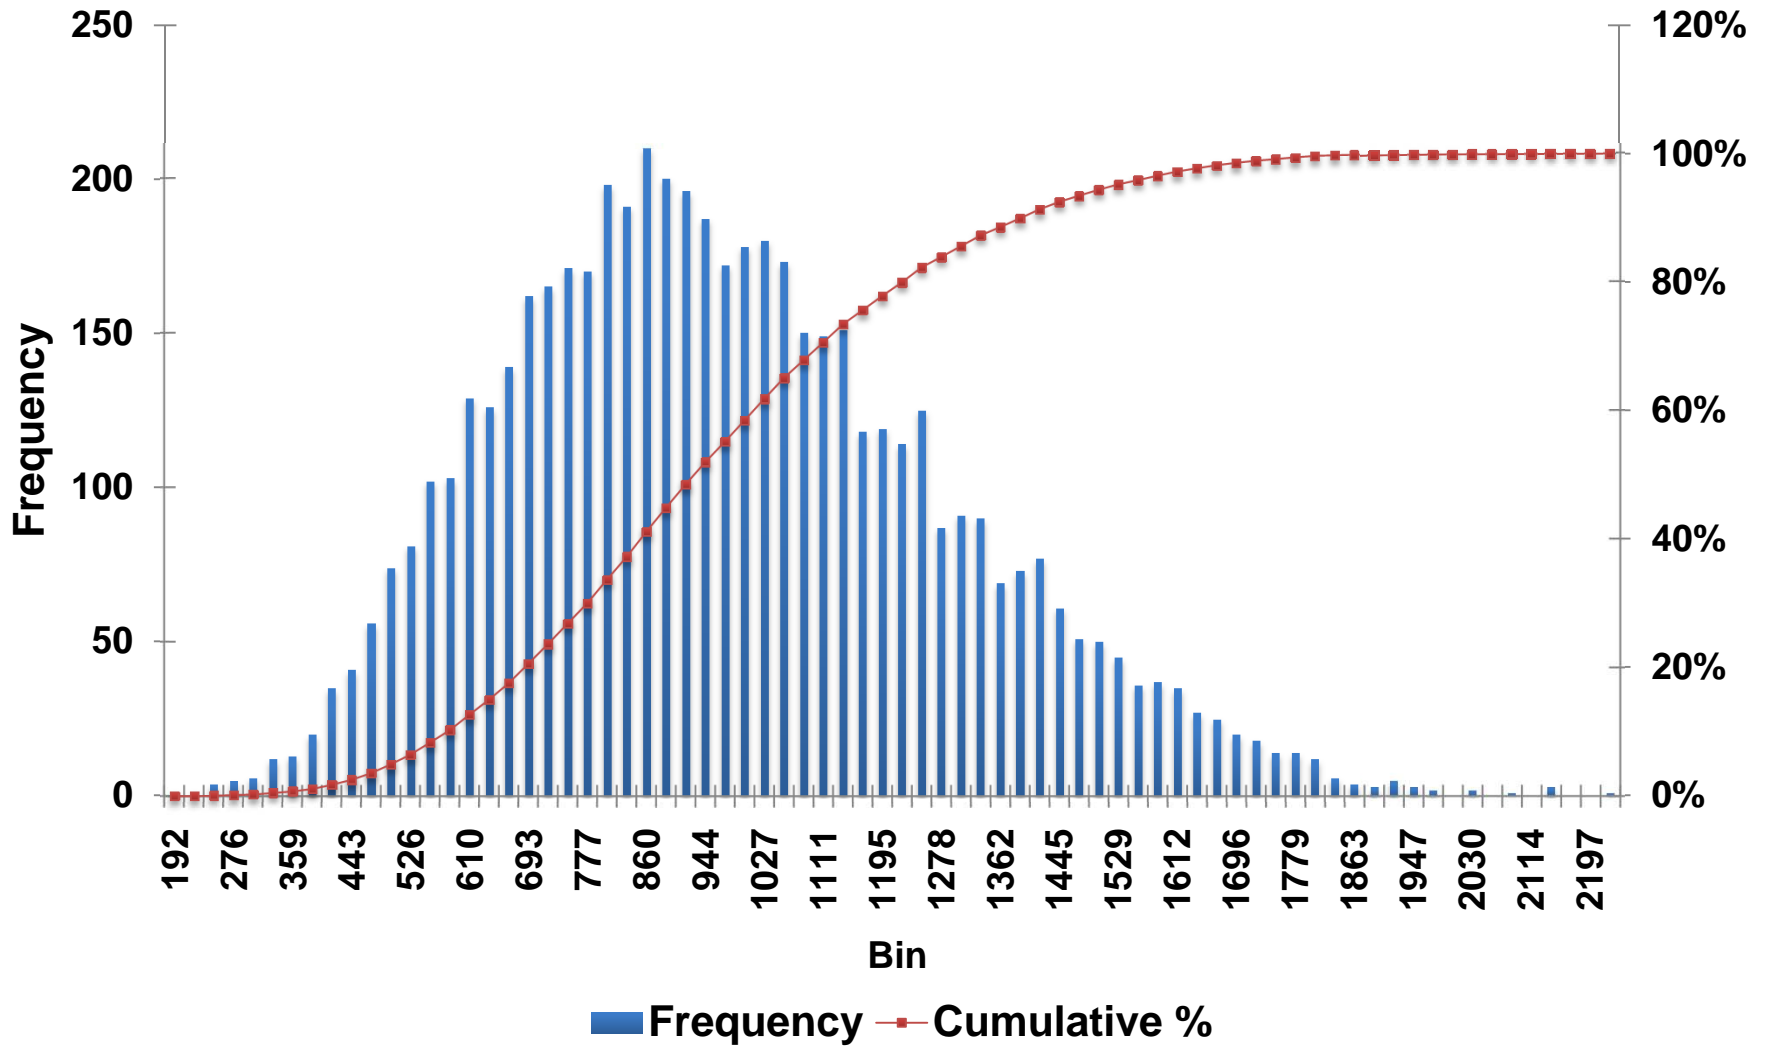

Supplement: npp2014290x6.pdf [file npp2014290x6.pdf]

### Histogram of CNV counts based on GNOSIS (autosomes)

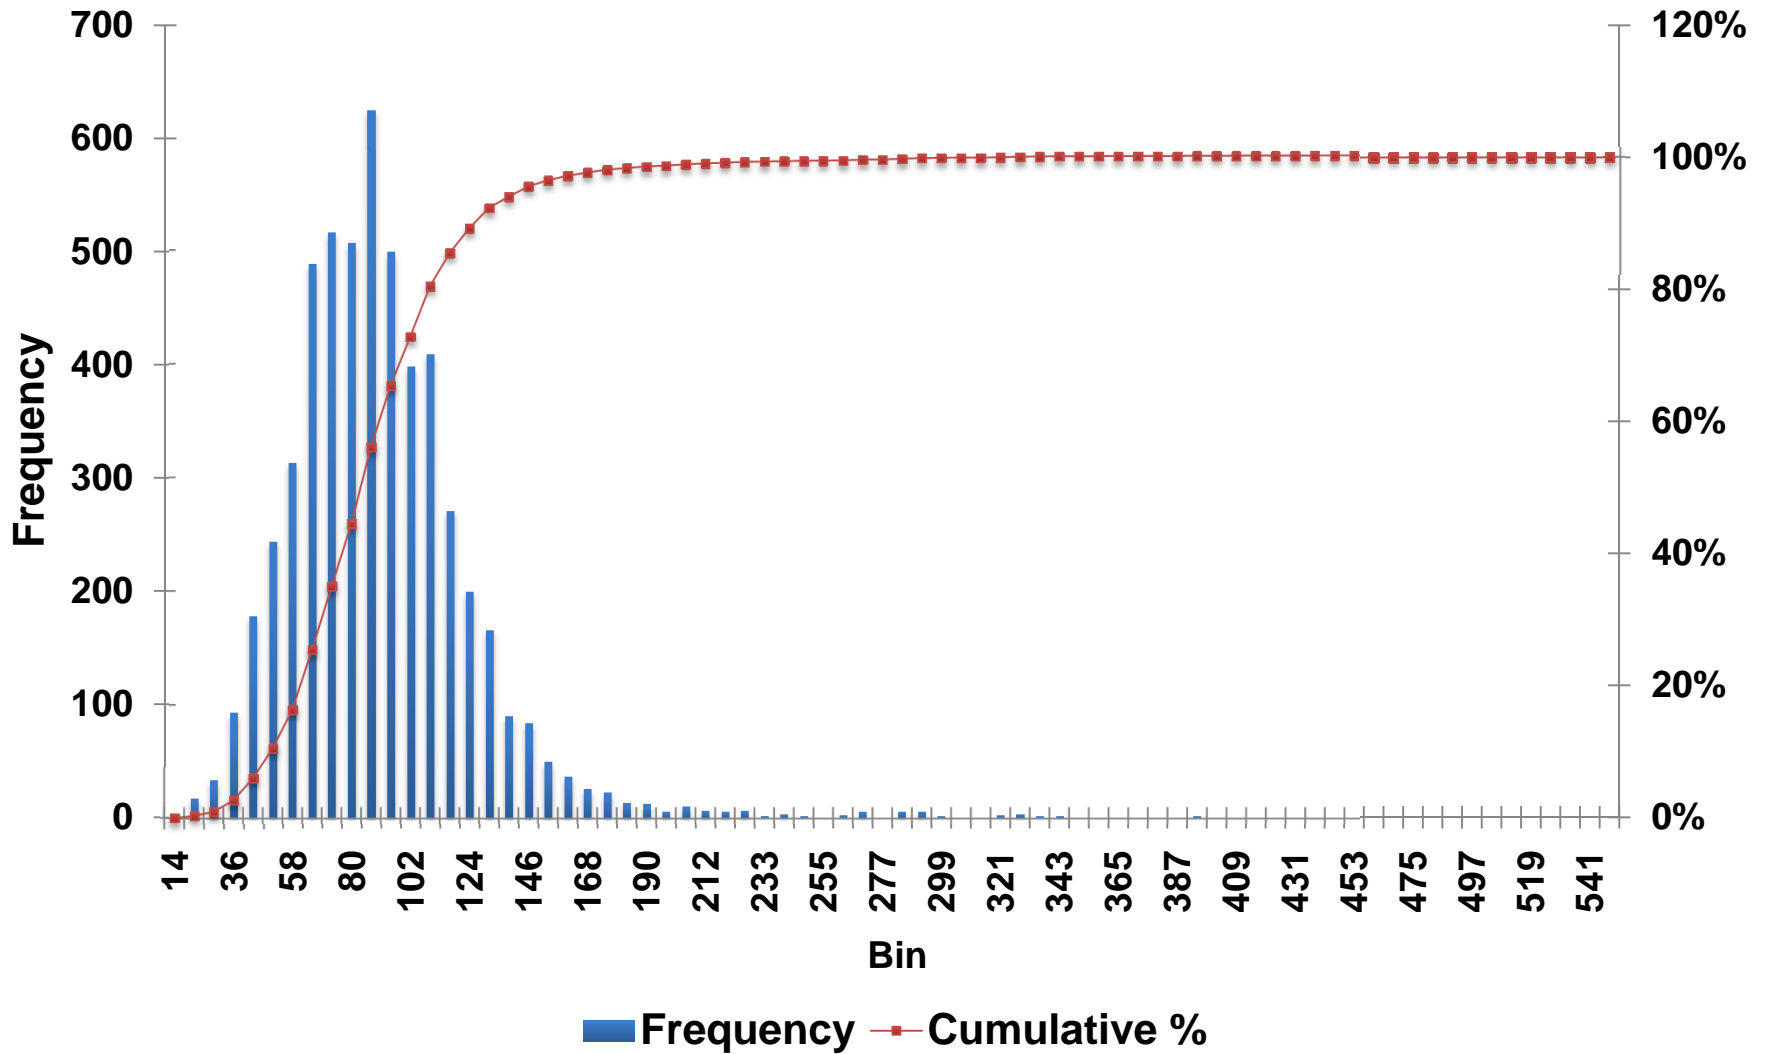

Supplement: npp2014290x7.pdf [file npp2014290x7.pdf]

### Histogram of percentages of CNVs marked in DGV

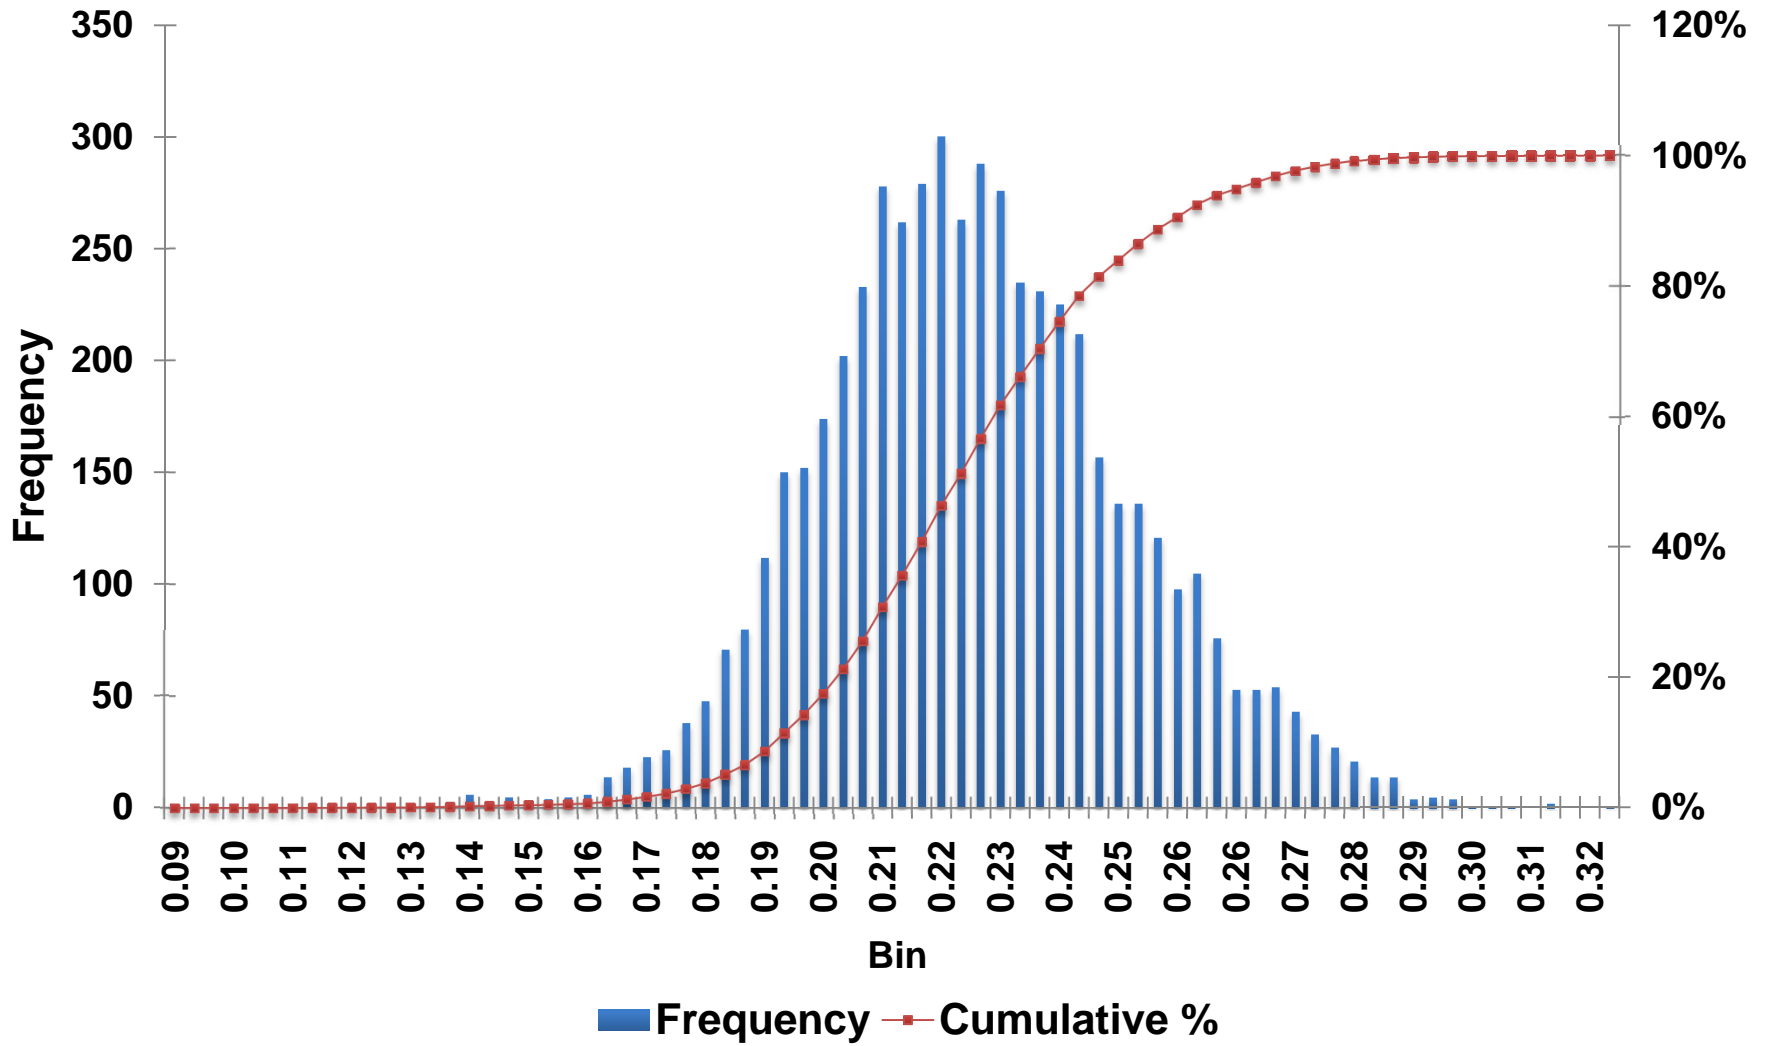

Supplement: npp2014290x8.pdf [file npp2014290x8.pdf]

### Histogram of AIM numbers used for ancestry inference

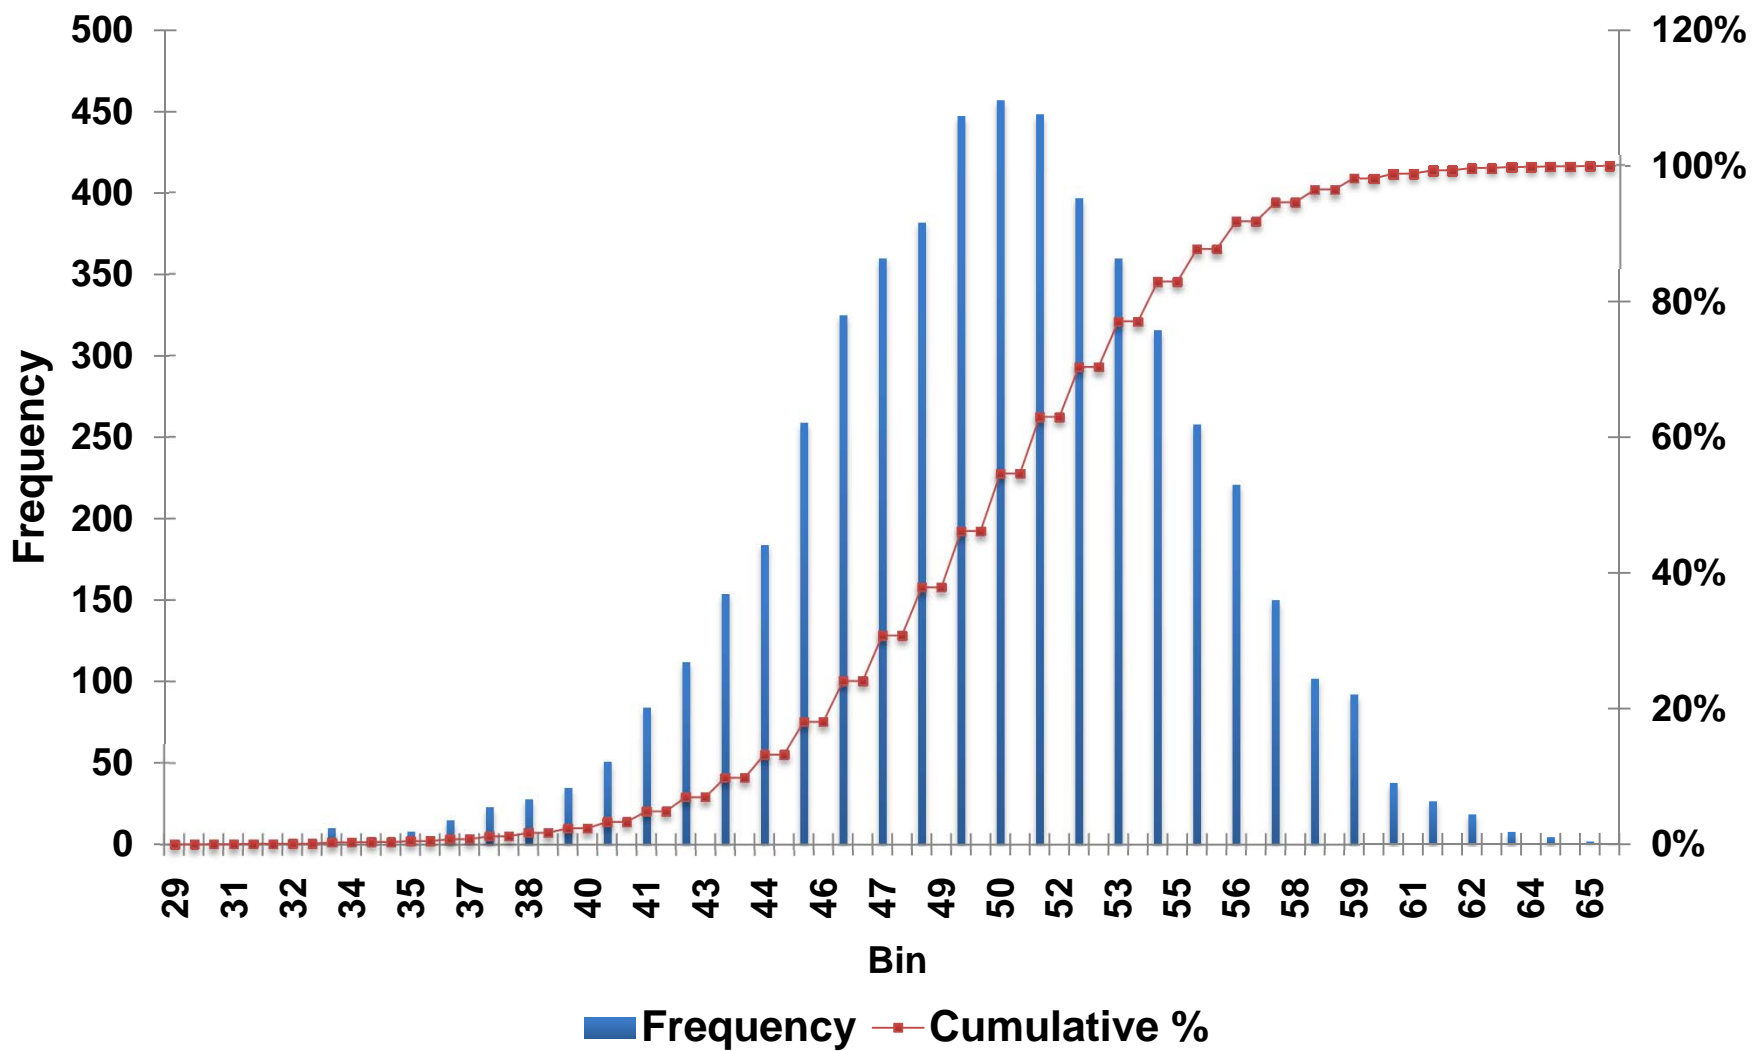

Supplement: npp2014290x9.pdf [file npp2014290x9.pdf]
